# Supplementary material for: Cognitive Benefits of Activity Engagement among 12,093 Adults Aged over 65 Years
Source: PubMed Central journal article supplement (PMC7764821; doi:10.3390/brainsci10120967), 2020-12-10
Supplement: brainsci-10-00967-s001.pdf [file brainsci-10-00967-s001.pdf]

**Supplementary Table S1.** Model fits ( $R^2$ ) of regression models for cognitive abilities.

| Model | The young-elderly group (below 80 years) |             |             |        |          | The old-old group (80-99.5 years) |             |             |        |          | The oldest-old group (above 100 years) |             |             |        |          |
|-------|------------------------------------------|-------------|-------------|--------|----------|-----------------------------------|-------------|-------------|--------|----------|----------------------------------------|-------------|-------------|--------|----------|
|       | General cognition                        | Orientation | Calculation | Recall | Language | General cognition                 | Orientation | Calculation | Recall | Language | General cognition                      | Orientation | Calculation | Recall | Language |
| M0    | .043                                     | .011        | .021        | .007   | .017     | .057                              | .015        | .027        | .015   | .027     | .048                                   | .010        | .015        | .013   | .015     |
| M1    | .089                                     | .032        | .064        | .032   | .029     | .091                              | .046        | .075        | .028   | .034     | .053                                   | .038        | .048        | .041   | .030     |
| M2    | .102                                     | .033        | .068        | .033   | .034     | .110                              | .048        | .081        | .032   | .038     | .086                                   | .041        | .053        | .045   | .034     |
| M3    | .102                                     | .039        | .073        | .033   | .035     | .111                              | .049        | .082        | .033   | .039     | .087                                   | .042        | .055        | .046   | .038     |

**Supplementary Table S2.** Regression models of general cognition among the young-old group.

| Variable                               | M0      |      |             | M1       |      |               | M2                 |      |               | M3                 |      |               |
|----------------------------------------|---------|------|-------------|----------|------|---------------|--------------------|------|---------------|--------------------|------|---------------|
|                                        | $\beta$ | SE   | 95% CI      | $\beta$  | SE   | 95% CI        | $\beta$            | SE   | 95% CI        | $\beta$            | SE   | 95% CI        |
| Age                                    | —       | —    | —           | -0.07*** | 0.01 | [-0.09,-0.06] | -0.07***           | 0.01 | [-0.09,-0.05] | -0.07***           | 0.01 | [-0.09,-0.05] |
| Male                                   | —       | —    | —           | 0.29***  | 0.07 | [0.15,0.43]   | 0.30***            | 0.07 | [0.16,0.45]   | 0.11               | 0.34 | [-0.56,0.78]  |
| Living alone                           | —       | —    | —           | -0.15    | 0.10 | [-0.35,0.04]  | -0.17 <sup>†</sup> | 0.10 | [-0.36,0.02]  | -0.18 <sup>†</sup> | 0.10 | [-0.37,0.02]  |
| Urban residence                        | —       | —    | —           | 0.07     | 0.09 | [-0.10,0.24]  | -0.02              | 0.09 | [-0.20,0.17]  | -0.02              | 0.09 | [-0.20,0.16]  |
| Years of education                     | —       | —    | —           | 0.08***  | 0.01 | [0.06,0.10]   | 0.07***            | 0.01 | [0.05,0.09]   | 0.07***            | 0.01 | [0.05,0.09]   |
| Professional/administration occupation | —       | —    | —           | 0.02     | 0.12 | [-0.22,0.27]  | -0.01              | 0.12 | [-0.25,0.23]  | 0.00               | 0.13 | [-0.25,0.24]  |
| ADL-related disability                 | —       | —    | —           | -0.23*** | 0.05 | [-0.33,-0.14] | -0.11 <sup>†</sup> | 0.05 | [-0.21,0]     | -0.11 <sup>†</sup> | 0.05 | [-0.21,-0.01] |
| Subjective health                      | —       | —    | —           | 0.29***  | 0.04 | [0.22,0.36]   | 0.25***            | 0.04 | [0.18,0.32]   | 0.25***            | 0.04 | [0.18,0.33]   |
| C2                                     | 1.56*** | 0.18 | [1.21,1.91] | —        | —    | —             | 1.24***            | 0.19 | [0.87,1.60]   | 1.10***            | 0.28 | [0.56,1.64]   |
| C3                                     | 2.26*** | 0.18 | [1.90,2.61] | —        | —    | —             | 1.50***            | 0.20 | [1.12,1.89]   | 1.42***            | 0.29 | [0.85,1.99]   |
| C4                                     | 1.56*** | 0.19 | [1.19,1.94] | —        | —    | —             | 1.18***            | 0.20 | [0.78,1.57]   | 1.12***            | 0.30 | [0.54,1.70]   |
| C5                                     | 1.61*** | 0.23 | [1.17,2.05] | —        | —    | —             | 1.15***            | 0.23 | [0.71,1.6]    | 0.97 <sup>†</sup>  | 0.42 | [0.14,1.79]   |
| C2×Male                                | —       | —    | —           | —        | —    | —             | —                  | —    | —             | 0.26               | 0.35 | [-0.44,0.95]  |
| C3×Male                                | —       | —    | —           | —        | —    | —             | —                  | —    | —             | 0.15               | 0.36 | [-0.56,0.86]  |
| C4×Male                                | —       | —    | —           | —        | —    | —             | —                  | —    | —             | 0.09               | 0.38 | [-0.66,0.84]  |
| C5×Male                                | —       | —    | —           | —        | —    | —             | —                  | —    | —             | 0.29               | 0.50 | [-0.69,1.26]  |

Note. <sup>†</sup> $p < .10$ , \* $p < .05$ , \*\* $p < .01$ , \*\*\* $p < .001$ . The regression coefficients in Tables 2–16 are unstandardized betas.

**Supplementary Table S3.** Regression models of orientation ability among the young-old group.

| Variable                               | M0      |      |             | M1       |      |               | M2       |      |               | M3       |      |               |
|----------------------------------------|---------|------|-------------|----------|------|---------------|----------|------|---------------|----------|------|---------------|
|                                        | $\beta$ | SE   | 95% CI      | $\beta$  | SE   | 95% CI        | $\beta$  | SE   | 95% CI        | $\beta$  | SE   | 95% CI        |
| Age                                    | —       | —    | —           | 0.00***  | 0.00 | [0,0]         | 0.00***  | 0.00 | [0,0]         | 0.00***  | 0.00 | [0,0]         |
| Male                                   | —       | —    | —           | 0.01***  | 0.00 | [0,0.01]      | 0.01*    | 0.00 | [0,0.01]      | -0.04*** | 0.01 | [-0.06,-0.02] |
| Living alone                           | —       | —    | —           | 0.00     | 0.00 | [-0.01,0.01]  | 0.00     | 0.00 | [-0.01,0.01]  | 0.00     | 0.00 | [-0.01,0.01]  |
| Urban residence                        | —       | —    | —           | 0.00     | 0.00 | [0,0.01]      | 0.00     | 0.00 | [-0.01,0.01]  | 0.00     | 0.00 | [-0.01,0.01]  |
| Years of education                     | —       | —    | —           | 0.00*    | 0.00 | [0,0]         | 0.00*    | 0.00 | [0,0]         | 0.00*    | 0.00 | [0,0]         |
| Professional/administration occupation | —       | —    | —           | 0.00     | 0.00 | [-0.01,0.01]  | 0.00     | 0.00 | [-0.01,0.01]  | 0.00     | 0.00 | [-0.01,0.01]  |
| ADL-related disability                 | —       | —    | —           | -0.01*** | 0.00 | [-0.01,-0.01] | -0.01*** | 0.00 | [-0.01,-0.01] | -0.01*** | 0.00 | [-0.01,-0.01] |
| Subjective health                      | —       | —    | —           | 0.00***  | 0.00 | [0,0.01]      | 0.00***  | 0.00 | [0,0.01]      | 0.00***  | 0.00 | [0,0.01]      |
| C2                                     | 0.02*** | 0.01 | [0.01,0.03] | —        | —    | —             | 0.01†    | 0.01 | [0,0.02]      | -0.02*   | 0.01 | [-0.04,0]     |
| C3                                     | 0.03*** | 0.01 | [0.02,0.04] | —        | —    | —             | 0.01*    | 0.01 | [0,0.03]      | -0.01    | 0.01 | [-0.03,0.01]  |
| C4                                     | 0.03*** | 0.01 | [0.02,0.04] | —        | —    | —             | 0.01*    | 0.01 | [0,0.02]      | -0.02†   | 0.01 | [-0.03,0]     |
| C5                                     | 0.03**  | 0.01 | [0.01,0.04] | —        | —    | —             | 0.01     | 0.01 | [0,0.02]      | -0.03*   | 0.01 | [-0.06,-0.01] |
| C2×Male                                | —       | —    | —           | —        | —    | —             | —        | —    | —             | 0.05***  | 0.01 | [0.03,0.07]   |
| C3×Male                                | —       | —    | —           | —        | —    | —             | —        | —    | —             | 0.04***  | 0.01 | [0.02,0.07]   |
| C4×Male                                | —       | —    | —           | —        | —    | —             | —        | —    | —             | 0.05***  | 0.01 | [0.03,0.07]   |
| C5×Male                                | —       | —    | —           | —        | —    | —             | —        | —    | —             | 0.07***  | 0.02 | [0.04,0.10]   |

Note. † $p < .10$ , \* $p < .05$ , \*\* $p < .01$ , \*\*\* $p < .001$ .

**Supplementary Table S4.** Regression models of calculation ability among the young-old group.

| Variable                               | M0      |      |             | M1       |      |              | M2      |      |              | M3      |      |               |
|----------------------------------------|---------|------|-------------|----------|------|--------------|---------|------|--------------|---------|------|---------------|
|                                        | $\beta$ | SE   | 95% CI      | $\beta$  | SE   | 95% CI       | $\beta$ | SE   | 95% CI       | $\beta$ | SE   | 95% CI        |
| Age                                    | —       | —    | —           | -0.01*** | 0.00 | [-0.01,0]    | 0.00*** | 0.00 | [-0.01,0]    | 0.00*** | 0.00 | [-0.01,0]     |
| Male                                   | —       | —    | —           | 0.04***  | 0.01 | [0.03,0.06]  | 0.04*** | 0.01 | [0.03,0.06]  | 0.12*** | 0.03 | [0.06,0.18]   |
| Living alone                           | —       | —    | —           | 0.00     | 0.01 | [-0.02,0.02] | 0.00    | 0.01 | [-0.02,0.02] | 0.00    | 0.01 | [-0.02,0.02]  |
| Urban residence                        | —       | —    | —           | 0.02**   | 0.01 | [0.01,0.04]  | 0.02*   | 0.01 | [0,0.04]     | 0.02*   | 0.01 | [0,0.03]      |
| Years of education                     | —       | —    | —           | 0.01***  | 0.00 | [0,0.01]     | 0.01*** | 0.00 | [0,0.01]     | 0.01*** | 0.00 | [0,0.01]      |
| Professional/administration occupation | —       | —    | —           | 0.00     | 0.01 | [-0.02,0.02] | -0.01   | 0.01 | [-0.03,0.02] | 0.00    | 0.01 | [-0.02,0.02]  |
| ADL-related disability                 | —       | —    | —           | -0.01*   | 0.00 | [-0.02,0]    | -0.01   | 0.01 | [-0.01,0]    | 0.00    | 0.01 | [-0.01,0.01]  |
| Subjective health                      | —       | —    | —           | 0.02***  | 0.00 | [0.01,0.02]  | 0.01*** | 0.00 | [0.01,0.02]  | 0.01*** | 0.00 | [0.01,0.02]   |
| C2                                     | 0.07*** | 0.02 | [0.03,0.10] | —        | —    | —            | 0.06**  | 0.02 | [0.02,0.09]  | 0.10*** | 0.03 | [0.05,0.15]   |
| C3                                     | 0.12*** | 0.02 | [0.08,0.15] | —        | —    | —            | 0.07*** | 0.02 | [0.03,0.10]  | 0.13*** | 0.03 | [0.08,0.18]   |
| C4                                     | 0.06*** | 0.02 | [0.03,0.09] | —        | —    | —            | 0.04*   | 0.02 | [0,0.07]     | 0.09**  | 0.03 | [0.04,0.14]   |
| C5                                     | 0.08*** | 0.02 | [0.04,0.12] | —        | —    | —            | 0.05*   | 0.02 | [0.01,0.09]  | 0.04    | 0.04 | [-0.04,0.11]  |
| C2×Male                                | —       | —    | —           | —        | —    | —            | —       | —    | —            | -0.07*  | 0.03 | [-0.13,-0.01] |
| C3×Male                                | —       | —    | —           | —        | —    | —            | —       | —    | —            | -0.11** | 0.03 | [-0.17,-0.05] |
| C4×Male                                | —       | —    | —           | —        | —    | —            | —       | —    | —            | -0.08*  | 0.03 | [-0.15,-0.01] |
| C5×Male                                | —       | —    | —           | —        | —    | —            | —       | —    | —            | 0.00    | 0.04 | [-0.09,0.08]  |

Note. † $p < .10$ , \* $p < .05$ , \*\* $p < .01$ , \*\*\* $p < .001$ .

**Supplementary Table S5.** Regression models of recall ability among the young-old group.

| Variable                               | M0                |      |              | M1       |      |              | M2       |         |              | M3       |      |              |
|----------------------------------------|-------------------|------|--------------|----------|------|--------------|----------|---------|--------------|----------|------|--------------|
|                                        | $\beta$           | SE   | 95% CI       | $\beta$  | SE   | 95% CI       | $\beta$  | SE      | 95% CI       | $\beta$  | SE   | 95% CI       |
| Age                                    | —                 | —    | —            | -0.01*** | 0.00 | [-0.01,0.01] | -0.01*** | 0.00    | [-0.01,0]    | -0.01*** | 0.00 | [-0.01,0]    |
| Male                                   | —                 | —    | —            | 0.00     | 0.01 | [-0.02,0.02] | 0.00     | 0.01    | [-0.02,0.02] | -0.04    | 0.05 | [-0.12,0.06] |
| Living alone                           | —                 | —    | —            | 0.00     | 0.01 | [-0.03,0.02] | 0.00     | 0.01    | [-0.03,0.02] | 0.00     | 0.01 | [-0.03,0.02] |
| Urban residence                        | —                 | —    | —            | -0.01    | 0.01 | [-0.03,0.02] | -0.01    | 0.01    | [-0.03,0.02] | -0.01    | 0.01 | [-0.03,0.02] |
| Years of education                     | —                 | —    | —            | 0.01***  | 0.00 | [0,0.01]     | 0.01***  | 0.00    | [0,0.01]     | 0.01***  | 0.00 | [0,0.01]     |
| Professional/administration occupation | —                 | —    | —            | 0.00     | 0.02 | [-0.03,0.04] | 0.00     | 0.02    | [-0.03,0.03] | 0.00     | 0.02 | [-0.03,0.03] |
| ADL-related disability                 | —                 | —    | —            | -0.01    | 0.01 | [-0.02,0.01] | 0.00     | 0.01    | [-0.02,0.01] | 0.00     | 0.01 | [-0.02,0.01] |
| Subjective health                      | —                 | —    | —            | 0.03***  | 0.01 | [0.02,0.04]  | 0.02***  | 0.01*** | [0.02,0.03]  | 0.02***  | 0.01 | [0.02,0.03]  |
| C2                                     | 0.04 <sup>†</sup> | 0.02 | [0,0.09]     | —        | —    | —            | 0.02     | 0.03    | [-0.03,0.07] | 0.00     | 0.04 | [-0.08,0.07] |
| C3                                     | 0.09***           | 0.02 | [0.04,0.13]  | —        | —    | —            | 0.03     | 0.03    | [-0.02,0.08] | 0.01     | 0.04 | [-0.07,0.08] |
| C4                                     | 0.03              | 0.03 | [-0.02,0.08] | —        | —    | —            | 0.00     | 0.03    | [-0.06,0.05] | -0.02    | 0.04 | [-0.10,0.06] |
| C5                                     | 0.05 <sup>†</sup> | 0.03 | [0,0.11]     | —        | —    | —            | 0.02     | 0.03    | [-0.04,0.08] | -0.02    | 0.06 | [-0.13,0.09] |
| C2×Male                                | —                 | —    | —            | —        | —    | —            | —        | —       | —            | 0.04     | 0.05 | [-0.05,0.13] |
| C3×Male                                | —                 | —    | —            | —        | —    | —            | —        | —       | —            | 0.04     | 0.05 | [-0.06,0.13] |
| C4×Male                                | —                 | —    | —            | —        | —    | —            | —        | —       | —            | 0.03     | 0.05 | [-0.07,0.13] |
| C5×Male                                | —                 | —    | —            | —        | —    | —            | —        | —       | —            | 0.06     | 0.07 | [-0.07,0.19] |

Note. <sup>†</sup> $p < .10$ , \* $p < .05$ , \*\* $p < .01$ , \*\*\* $p < .001$ .

**Supplementary Table S6.** Regression models of language ability among the young-old group.

| Variable                               | M0      |      |             | M1                |      |              | M2                |      |              | M3                |      |              |
|----------------------------------------|---------|------|-------------|-------------------|------|--------------|-------------------|------|--------------|-------------------|------|--------------|
|                                        | $\beta$ | SE   | 95% CI      | $\beta$           | SE   | 95% CI       | $\beta$           | SE   | 95% CI       | $\beta$           | SE   | 95% CI       |
| Age                                    | —       | —    | —           | 0.00***           | 0.00 | [0,0]        | 0.00**            | 0.00 | [0,0]        | 0.00**            | 0.00 | [0,0]        |
| Male                                   | —       | —    | —           | 0.00 <sup>†</sup> | 0.00 | [0,0.01]     | 0.01 <sup>†</sup> | 0.00 | [0,0.01]     | -0.02             | 0.01 | [-0.04,0.01] |
| Living alone                           | —       | —    | —           | 0.00              | 0.00 | [-0.01,0]    | 0.00              | 0.00 | [-0.01,0]    | 0.00              | 0.00 | [-0.01,0]    |
| Urban residence                        | —       | —    | —           | 0.01**            | 0.00 | [0,0.02]     | 0.01**            | 0.00 | [0,0.01]     | 0.01*             | 0.00 | [0,0.01]     |
| Years of education                     | —       | —    | —           | 0.00**            | 0.00 | [0,0]        | 0.00**            | 0.00 | [0,0]        | 0.00**            | 0.00 | [0,0]        |
| Professional/administration occupation | —       | —    | —           | 0.00              | 0.00 | [-0.01,0.01] | 0.00              | 0.00 | [-0.01,0.01] | 0.00              | 0.00 | [-0.01,0.01] |
| ADL-related disability                 | —       | —    | —           | -0.01***          | 0.00 | [-0.01,0]    | -0.01**           | 0.00 | [-0.01,0]    | -0.01**           | 0.00 | [-0.01,0]    |
| Subjective health                      | —       | —    | —           | 0.01***           | 0.00 | [0,0.01]     | 0.01**            | 0.00 | [0,0.01]     | 0.01**            | 0.00 | [0,0.01]     |
| C2                                     | 0.03*** | 0.01 | [0.02,0.04] | —                 | —    | —            | 0.02*             | 0.01 | [0,0.03]     | 0.00              | 0.01 | [-0.02,0.02] |
| C3                                     | 0.04*** | 0.01 | [0.03,0.06] | —                 | —    | —            | 0.02**            | 0.01 | [0.01,0.04]  | 0.02              | 0.01 | [-0.01,0.04] |
| C4                                     | 0.04*** | 0.01 | [0.02,0.05] | —                 | —    | —            | 0.02**            | 0.01 | [0.01,0.04]  | 0.01              | 0.01 | [-0.01,0.03] |
| C5                                     | 0.02**  | 0.01 | [0.01,0.04] | —                 | —    | —            | 0.01              | 0.01 | [-0.01,0.03] | -0.01             | 0.02 | [-0.04,0.02] |
| C2×Male                                | —       | —    | —           | —                 | —    | —            | —                 | —    | —            | 0.02 <sup>†</sup> | 0.01 | [0,0.05]     |
| C3×Male                                | —       | —    | —           | —                 | —    | —            | —                 | —    | —            | 0.02              | 0.01 | [-0.01,0.04] |
| C4×Male                                | —       | —    | —           | —                 | —    | —            | —                 | —    | —            | 0.02              | 0.01 | [-0.01,0.05] |
| C5×Male                                | —       | —    | —           | —                 | —    | —            | —                 | —    | —            | 0.03 <sup>†</sup> | 0.02 | [0,0.07]     |

Note. <sup>†</sup> $p < .10$ , \* $p < .05$ , \*\* $p < .01$ , \*\*\* $p < .001$ .

**Supplementary Table S7.** Regression models of general cognition among the old-old group.

| Variable                               | M0      |      |             | M1       |      |               | M2       |      |               | M3       |      |               |
|----------------------------------------|---------|------|-------------|----------|------|---------------|----------|------|---------------|----------|------|---------------|
|                                        | $\beta$ | SE   | 95% CI      | $\beta$  | SE   | 95% CI        | $\beta$  | SE   | 95% CI        | $\beta$  | SE   | 95% CI        |
| Age                                    | —       | —    | —           | -0.10*** | 0.01 | [-0.11,-0.08] | -0.08*** | 0.01 | [-0.09,-0.06] | -0.08*** | 0.01 | [-0.09,-0.06] |
| Male                                   | —       | —    | —           | 0.49***  | 0.08 | [0.33,0.65]   | 0.44***  | 0.08 | [0.28,0.6]    | 0.54**   | 0.16 | [0.22,0.86]   |
| Living alone                           | —       | —    | —           | -0.06    | 0.10 | [-0.25,0.13]  | -0.07    | 0.10 | [-0.26,0.11]  | -0.07    | 0.10 | [-0.26,0.11]  |
| Urban residence                        | —       | —    | —           | 0.06     | 0.10 | [-0.14,0.25]  | -0.13    | 0.10 | [-0.33,0.07]  | -0.14    | 0.10 | [-0.33,0.06]  |
| Years of education                     | —       | —    | —           | 0.12***  | 0.02 | [0.09,0.15]   | 0.10***  | 0.02 | [0.07,0.13]   | 0.10***  | 0.02 | [0.07,0.13]   |
| Professional/administration occupation | —       | —    | —           | 0.46**   | 0.17 | [0.13,0.79]   | 0.34*    | 0.17 | [0.01,0.67]   | 0.35*    | 0.17 | [0.03,0.68]   |
| ADL-related disability                 | —       | —    | —           | -0.20*** | 0.03 | [-0.26,-0.15] | -0.12*** | 0.03 | [-0.18,-0.07] | -0.12*** | 0.03 | [-0.18,-0.07] |
| Subjective health                      | —       | —    | —           | 0.35***  | 0.04 | [0.27,0.43]   | 0.29***  | 0.04 | [0.21,0.37]   | 0.29***  | 0.04 | [0.21,0.37]   |
| C2                                     | 1.26*** | 0.10 | [1.06,1.46] | —        | —    | —             | 0.85***  | 0.11 | [0.63,1.06]   | 0.85***  | 0.14 | [0.58,1.11]   |
| C3                                     | 2.67*** | 0.14 | [2.39,2.95] | —        | —    | —             | 1.68***  | 0.15 | [1.38,1.98]   | 2.09***  | 0.24 | [1.62,2.55]   |
| C4                                     | 1.65*** | 0.13 | [1.41,1.9]  | —        | —    | —             | 1.06***  | 0.13 | [0.81,1.32]   | 1.09***  | 0.18 | [0.73,1.45]   |
| C5                                     | 1.11*** | 0.13 | [0.85,1.37] | —        | —    | —             | 0.65***  | 0.13 | [0.39,0.91]   | 0.76***  | 0.20 | [0.38,1.14]   |
| C2×Male                                | —       | —    | —           | —        | —    | —             | —        | —    | —             | -0.01    | 0.20 | [-0.41,0.4]   |
| C3×Male                                | —       | —    | —           | —        | —    | —             | —        | —    | —             | -0.64*   | 0.30 | [-1.22,-0.07] |
| C4×Male                                | —       | —    | —           | —        | —    | —             | —        | —    | —             | -0.07    | 0.25 | [-0.57,0.42]  |
| C5×Male                                | —       | —    | —           | —        | —    | —             | —        | —    | —             | -0.22    | 0.27 | [-0.74,0.3]   |

Note. † $p < .10$ , \* $p < .05$ , \*\* $p < .01$ , \*\*\* $p < .001$ .

**Supplementary Table S8.** Regression models of orientation ability among the old-old group.

| Variable                               | M0      |      |             | M1       |      |               | M2       |      |               | M3       |      |               |
|----------------------------------------|---------|------|-------------|----------|------|---------------|----------|------|---------------|----------|------|---------------|
|                                        | $\beta$ | SE   | 95% CI      | $\beta$  | SE   | 95% CI        | $\beta$  | SE   | 95% CI        | $\beta$  | SE   | 95% CI        |
| Age                                    | —       | —    | —           | 0.00***  | 0.00 | [0,0]         | 0.00***  | 0.00 | [0,0]         | 0.00***  | 0.00 | [0,0]         |
| Male                                   | —       | —    | —           | 0.01***  | 0.00 | [0.01,0.02]   | 0.01***  | 0.00 | [0.01,0.02]   | 0.01     | 0.01 | [0,0.02]      |
| Living alone                           | —       | —    | —           | 0.01*    | 0.00 | [0,0.01]      | 0.01*    | 0.00 | [0,0.02]      | 0.01*    | 0.00 | [0,0.02]      |
| Urban residence                        | —       | —    | —           | -0.01**  | 0.00 | [-0.02,0]     | -0.01*** | 0.00 | [-0.02,-0.01] | -0.01*** | 0.00 | [-0.02,-0.01] |
| Years of education                     | —       | —    | —           | 0.00***  | 0.00 | [0,0]         | 0.00***  | 0.00 | [0,0]         | 0.00***  | 0.00 | [0,0]         |
| Professional/administration occupation | —       | —    | —           | 0.00     | 0.01 | [-0.01,0.01]  | 0.00     | 0.01 | [-0.01,0.01]  | 0.00     | 0.01 | [-0.01,0.01]  |
| ADL-related disability                 | —       | —    | —           | -0.01*** | 0.00 | [-0.01,-0.01] | -0.01*** | 0.00 | [-0.01,-0.01] | -0.01*** | 0.00 | [-0.01,-0.01] |
| Subjective health                      | —       | —    | —           | 0.01***  | 0.00 | [0.01,0.01]   | 0.01***  | 0.00 | [0.01,0.01]   | 0.01***  | 0.00 | [0.01,0.01]   |
| C2                                     | 0.02*** | 0.00 | [0.02,0.03] | —        | —    | —             | 0.01†    | 0.00 | [0,0.01]      | 0.01     | 0.01 | [-0.01,0.02]  |
| C3                                     | 0.05*** | 0.01 | [0.04,0.06] | —        | —    | —             | 0.02**   | 0.01 | [0.01,0.03]   | 0.02*    | 0.01 | [0,0.04]      |
| C4                                     | 0.03*** | 0.01 | [0.03,0.04] | —        | —    | —             | 0.02***  | 0.01 | [0.01,0.03]   | 0.01*    | 0.01 | [0,0.03]      |
| C5                                     | 0.02*** | 0.00 | [0.02,0.03] | —        | —    | —             | 0.01*    | 0.01 | [0,0.02]      | 0.01†    | 0.01 | [0,0.03]      |
| C2×Male                                | —       | —    | —           | —        | —    | —             | —        | —    | —             | 0.00     | 0.01 | [-0.01,0.02]  |
| C3×Male                                | —       | —    | —           | —        | —    | —             | —        | —    | —             | 0.00     | 0.01 | [-0.02,0.02]  |
| C4×Male                                | —       | —    | —           | —        | —    | —             | —        | —    | —             | 0.01     | 0.01 | [-0.01,0.02]  |
| C5×Male                                | —       | —    | —           | —        | —    | —             | —        | —    | —             | 0.00     | 0.01 | [-0.02,0.02]  |

Note. † $p < .10$ , \* $p < .05$ , \*\* $p < .01$ , \*\*\* $p < .001$ .



**Supplementary Table S9.** Regression models of calculation ability among the old-old group.

| Variable                               | M0      |      |             | M1                |      |               | M2                |      |              | M3                 |      |               |
|----------------------------------------|---------|------|-------------|-------------------|------|---------------|-------------------|------|--------------|--------------------|------|---------------|
|                                        | $\beta$ | SE   | 95% CI      | $\beta$           | SE   | 95% CI        | $\beta$           | SE   | 95% CI       | $\beta$            | SE   | 95% CI        |
| Age                                    | —       | —    | —           | -0.01***          | 0.00 | [-0.01,0]     | 0.00***           | 0.00 | [-0.01,0]    | 0.00***            | 0.00 | [-0.01,0]     |
| Male                                   | —       | —    | —           | 0.10***           | 0.01 | [0.09,0.12]   | 0.10***           | 0.01 | [0.08,0.11]  | 0.11***            | 0.02 | [0.08,0.14]   |
| Living alone                           | —       | —    | —           | 0.02 <sup>†</sup> | 0.01 | [0,0.03]      | 0.02 <sup>†</sup> | 0.01 | [0,0.03]     | 0.02 <sup>†</sup>  | 0.01 | [0,0.04]      |
| Urban residence                        | —       | —    | —           | 0.02              | 0.01 | [0,0.03]      | 0.01              | 0.01 | [-0.01,0.03] | 0.01               | 0.01 | [-0.01,0.02]  |
| Years of education                     | —       | —    | —           | 0.01***           | 0.00 | [0.01,0.01]   | 0.01***           | 0.00 | [0,0.01]     | 0.01***            | 0.00 | [0,0.01]      |
| Professional/administration occupation | —       | —    | —           | 0.01              | 0.02 | [-0.02,0.04]  | 0.00              | 0.02 | [-0.03,0.03] | 0.00               | 0.02 | [-0.03,0.04]  |
| ADL-related disability                 | —       | —    | —           | -0.01***          | 0.00 | [-0.02,-0.01] | -0.01**           | 0.00 | [-0.01,0]    | -0.01**            | 0.00 | [-0.01,0]     |
| Subjective health                      | —       | —    | —           | 0.02***           | 0.00 | [0.01,0.03]   | 0.02***           | 0.00 | [0.01,0.02]  | 0.02***            | 0.00 | [0.01,0.02]   |
| C2                                     | 0.07*** | 0.01 | [0.05,0.09] | —                 | —    | —             | 0.04***           | 0.01 | [0.02,0.07]  | 0.05**             | 0.01 | [0.02,0.07]   |
| C3                                     | 0.17*** | 0.01 | [0.14,0.19] | —                 | —    | —             | 0.09***           | 0.01 | [0.06,0.11]  | 0.13***            | 0.02 | [0.08,0.17]   |
| C4                                     | 0.10*** | 0.01 | [0.07,0.12] | —                 | —    | —             | 0.05***           | 0.01 | [0.02,0.07]  | 0.05**             | 0.02 | [0.02,0.09]   |
| C5                                     | 0.10*** | 0.01 | [0.08,0.13] | —                 | —    | —             | 0.06***           | 0.01 | [0.04,0.09]  | 0.08***            | 0.02 | [0.04,0.12]   |
| C2×Male                                | —       | —    | —           | —                 | —    | —             | —                 | —    | —            | 0.00               | 0.02 | [-0.04,0.04]  |
| C3×Male                                | —       | —    | —           | —                 | —    | —             | —                 | —    | —            | -0.06 <sup>†</sup> | 0.03 | [-0.12,-0.01] |
| C4×Male                                | —       | —    | —           | —                 | —    | —             | —                 | —    | —            | -0.01              | 0.02 | [-0.05,0.04]  |
| C5×Male                                | —       | —    | —           | —                 | —    | —             | —                 | —    | —            | -0.04              | 0.03 | [-0.09,0.01]  |

Note. <sup>†</sup> $p < .10$ , \* $p < .05$ , \*\* $p < .01$ , \*\*\* $p < .001$ .

**Supplementary Table S10.** Regression models of recall ability among the old-old group.

| Variable                               | M0      |      |             | M1      |      |              | M2      |      |              | M3      |      |              |
|----------------------------------------|---------|------|-------------|---------|------|--------------|---------|------|--------------|---------|------|--------------|
|                                        | $\beta$ | SE   | 95% CI      | $\beta$ | SE   | 95% CI       | $\beta$ | SE   | 95% CI       | $\beta$ | SE   | 95% CI       |
| Age                                    | —       | —    | —           | 0.00*** | 0.00 | [-0.01,0]    | 0.00**  | 0.00 | [0,0]        | 0.00**  | 0.00 | [0,0]        |
| Male                                   | —       | —    | —           | 0.03**  | 0.01 | [0.01,0.05]  | 0.03**  | 0.01 | [0.01,0.05]  | 0.04†   | 0.02 | [0,0.08]     |
| Living alone                           | —       | —    | —           | 0.01    | 0.01 | [-0.01,0.04] | 0.01    | 0.01 | [-0.01,0.04] | 0.01    | 0.01 | [-0.01,0.04] |
| Urban residence                        | —       | —    | —           | -0.01   | 0.01 | [-0.04,0.01] | -0.02†  | 0.01 | [-0.04,0]    | -0.02†  | 0.01 | [-0.05,0]    |
| Years of education                     | —       | —    | —           | 0.01*** | 0.00 | [0.01,0.01]  | 0.01*** | 0.00 | [0,0.01]     | 0.01*** | 0.00 | [0,0.01]     |
| Professional/administration occupation | —       | —    | —           | 0.04*   | 0.02 | [0,0.08]     | 0.03†   | 0.02 | [-0.01,0.07] | 0.03†   | 0.02 | [-0.01,0.07] |
| ADL-related disability                 | —       | —    | —           | -0.01** | 0.00 | [-0.02,0]    | -0.01*  | 0.00 | [-0.01,0]    | -0.01*  | 0.00 | [-0.01,0]    |
| Subjective health                      | —       | —    | —           | 0.03*** | 0.01 | [0.02,0.04]  | 0.03*** | 0.01 | [0.02,0.04]  | 0.03*** | 0.01 | [0.02,0.04]  |
| C2                                     | 0.05*** | 0.01 | [0.03,0.08] | —       | —    | —            | 0.03*   | 0.01 | [0,0.05]     | 0.03*   | 0.02 | [0,0.07]     |
| C3                                     | 0.16*** | 0.02 | [0.13,0.19] | —       | —    | —            | 0.10*** | 0.02 | [0.06,0.13]  | 0.12*** | 0.03 | [0.07,0.17]  |
| C4                                     | 0.06*** | 0.02 | [0.03,0.09] | —       | —    | —            | 0.02    | 0.02 | [-0.01,0.05] | 0.03    | 0.02 | [-0.01,0.07] |
| C5                                     | 0.05**  | 0.02 | [0.02,0.08] | —       | —    | —            | 0.02    | 0.02 | [-0.02,0.05] | 0.01    | 0.02 | [-0.04,0.06] |
| C2×Male                                | —       | —    | —           | —       | —    | —            | —       | —    | —            | -0.02   | 0.03 | [-0.07,0.03] |
| C3×Male                                | —       | —    | —           | —       | —    | —            | —       | —    | —            | -0.04   | 0.04 | [-0.11,0.03] |
| C4×Male                                | —       | —    | —           | —       | —    | —            | —       | —    | —            | -0.02   | 0.03 | [-0.08,0.04] |
| C5×Male                                | —       | —    | —           | —       | —    | —            | —       | —    | —            | 0.01    | 0.03 | [-0.05,0.07] |

Note. † $p < .10$ , \* $p < .05$ , \*\* $p < .01$ , \*\*\* $p < .001$ .

**Supplementary Table S11.** Regression models of language ability among the old-old group.

| Variable                               | M0      |      |             | M1       |      |             | M2       |      |              | M3       |      |              |
|----------------------------------------|---------|------|-------------|----------|------|-------------|----------|------|--------------|----------|------|--------------|
|                                        | $\beta$ | SE   | 95% CI      | $\beta$  | SE   | 95% CI      | $\beta$  | SE   | 95% CI       | $\beta$  | SE   | 95% CI       |
| Age                                    | —       | —    | —           | 0.00***  | 0.00 | [0,0]       | 0.00***  | 0.00 | [0,0]        | 0.00***  | 0.00 | [0,0]        |
| Male                                   | —       | —    | —           | 0.01*    | 0.00 | [0,0.02]    | 0.01     | 0.00 | [0,0.01]     | 0.00     | 0.01 | [-0.02,0.01] |
| Living alone                           | —       | —    | —           | 0.01**   | 0.00 | [0.01,0.02] | 0.01**   | 0.00 | [0.01,0.02]  | 0.01**   | 0.00 | [0.01,0.02]  |
| Urban residence                        | —       | —    | —           | 0.01**   | 0.01 | [0.01,0.02] | 0.01+    | 0.01 | [0,0.02]     | 0.01+    | 0.01 | [0,0.02]     |
| Years of education                     | —       | —    | —           | 0.00***  | 0.00 | [0,0]       | 0.00***  | 0.00 | [0,0]        | 0.00***  | 0.00 | [0,0]        |
| Professional/administration occupation | —       | —    | —           | 0.02+    | 0.01 | [0,0.03]    | 0.01     | 0.01 | [0,0.03]     | 0.01+    | 0.01 | [0,0.03]     |
| ADL-related disability                 | —       | —    | —           | -0.01*** | 0.00 | [-0.01,0]   | -0.01*** | 0.00 | [-0.01,0]    | -0.01*** | 0.00 | [-0.01,0]    |
| Subjective health                      | —       | —    | —           | 0.01***  | 0.00 | [0.01,0.02] | 0.01***  | 0.00 | [0.01,0.02]  | 0.01***  | 0.00 | [0.01,0.02]  |
| C2                                     | 0.01**  | 0.00 | [0.01,0.02] | —        | —    | —           | 0.00     | 0.01 | [-0.01,0.01] | -0.01    | 0.01 | [-0.02,0.01] |
| C3                                     | 0.05*** | 0.01 | [0.04,0.06] | —        | —    | —           | 0.02*    | 0.01 | [0,0.03]     | 0.03*    | 0.01 | [0.01,0.05]  |
| C4                                     | 0.05*** | 0.01 | [0.04,0.06] | —        | —    | —           | 0.03***  | 0.01 | [0.01,0.04]  | 0.02*    | 0.01 | [0,0.04]     |
| C5                                     | 0.02**  | 0.01 | [0.01,0.03] | —        | —    | —           | 0.01     | 0.01 | [-0.01,0.02] | 0.00     | 0.01 | [-0.02,0.02] |
| C2×Male                                | —       | —    | —           | —        | —    | —           | —        | —    | —            | 0.01     | 0.01 | [-0.01,0.03] |
| C3×Male                                | —       | —    | —           | —        | —    | —           | —        | —    | —            | -0.01    | 0.01 | [-0.04,0.02] |
| C4×Male                                | —       | —    | —           | —        | —    | —           | —        | —    | —            | 0.01     | 0.01 | [-0.01,0.03] |
| C5×Male                                | —       | —    | —           | —        | —    | —           | —        | —    | —            | 0.01     | 0.01 | [-0.02,0.03] |

Note. + $p < .10$ , \* $p < .05$ , \*\* $p < .01$ , \*\*\* $p < .001$ .

**Supplementary Table S12.** Regression models of general cognition among the oldest-old group.

| Variable                               | M0      |      |             | M1                |      |               | M2                |      |              | M3                |      |              |
|----------------------------------------|---------|------|-------------|-------------------|------|---------------|-------------------|------|--------------|-------------------|------|--------------|
|                                        | $\beta$ | SE   | 95% CI      | $\beta$           | SE   | 95% CI        | $\beta$           | SE   | 95% CI       | $\beta$           | SE   | 95% CI       |
| Age                                    | —       | —    | —           | -0.06             | 0.04 | [-0.15,0.02]  | -0.06             | 0.04 | [-0.14,0.03] | -0.06             | 0.04 | [-0.14,0.03] |
| Male                                   | —       | —    | —           | 0.80**            | 0.25 | [0.32,1.28]   | 0.80**            | 0.25 | [0.31,1.28]  | 1.06**            | 0.38 | [0.31,1.81]  |
| Living alone                           | —       | —    | —           | 0.08              | 0.31 | [-0.54,0.69]  | -0.13             | 0.31 | [-0.74,0.48] | -0.12             | 0.31 | [-0.73,0.49] |
| Urban residence                        | —       | —    | —           | 0.42 <sup>†</sup> | 0.23 | [-0.03,0.88]  | 0.35              | 0.23 | [-0.11,0.81] | 0.37              | 0.24 | [-0.09,0.83] |
| Years of education                     | —       | —    | —           | -0.02             | 0.05 | [-0.12,0.08]  | -0.03             | 0.05 | [-0.12,0.07] | -0.03             | 0.05 | [-0.12,0.07] |
| Professional/administration occupation | —       | —    | —           | 1.18 <sup>†</sup> | 0.61 | [-0.01,2.37]  | 1.04 <sup>†</sup> | 0.60 | [-0.13,2.21] | 1.11 <sup>†</sup> | 0.60 | [-0.07,2.28] |
| ADL-related disability                 | —       | —    | —           | -0.17***          | 0.04 | [-0.26,-0.09] | -0.07             | 0.05 | [-0.16,0.02] | -0.07             | 0.05 | [-0.16,0.02] |
| Subjective health                      | —       | —    | —           | 0.53***           | 0.12 | [0.30,0.75]   | 0.48***           | 0.12 | [0.26,0.71]  | 0.48***           | 0.12 | [0.25,0.70]  |
| C2                                     | 1.52*** | 0.24 | [1.06,1.98] | —                 | —    | —             | 1.50***           | 0.25 | [1.01,1.99]  | 1.51***           | 0.27 | [0.98,2.04]  |
| C3                                     | 3.06*** | 0.50 | [2.07,4.05] | —                 | —    | —             | 2.35***           | 0.52 | [1.33,3.37]  | 2.41**            | 0.70 | [1.04,3.79]  |
| C4                                     | 1.31*** | 0.30 | [0.73,1.90] | —                 | —    | —             | 0.83**            | 0.31 | [0.22,1.44]  | 1.03**            | 0.38 | [0.28,1.78]  |
| C5                                     | 0.77**  | 0.28 | [0.22,1.32] | —                 | —    | —             | 0.45              | 0.29 | [-0.12,1.02] | 0.66 <sup>†</sup> | 0.35 | [-0.03,1.34] |
| C2×Male                                | —       | —    | —           | —                 | —    | —             | —                 | —    | —            | 0.04              | 0.65 | [-1.23,1.30] |
| C3×Male                                | —       | —    | —           | —                 | —    | —             | —                 | —    | —            | -0.31             | 1.02 | [-2.32,1.70] |
| C4×Male                                | —       | —    | —           | —                 | —    | —             | —                 | —    | —            | -0.62             | 0.64 | [-1.88,0.64] |
| C5×Male                                | —       | —    | —           | —                 | —    | —             | —                 | —    | —            | -0.71             | 0.63 | [-1.94,0.52] |

Note. <sup>†</sup> $p < .10$ , \* $p < .05$ , \*\* $p < .01$ , \*\*\* $p < .001$ . The regression coefficients in Tables 1–10 are unstandardized betas.

Commented [KW1]: Please confirm consistency with the footer of Table 2.

**Supplementary Table S13.** Regression models of orientation ability among the oldest-old group.

| Variable                               | M0      |      |              | M1       |      |               | M2      |      |               | M3      |      |               |
|----------------------------------------|---------|------|--------------|----------|------|---------------|---------|------|---------------|---------|------|---------------|
|                                        | $\beta$ | SE   | 95% CI       | $\beta$  | SE   | 95% CI        | $\beta$ | SE   | 95% CI        | $\beta$ | SE   | 95% CI        |
| Age                                    | —       | —    | —            | 0.00     | 0.00 | [-0.01,0]     | 0.00    | 0.00 | [-0.01,0]     | 0.00    | 0.00 | [-0.01,0]     |
| Male                                   | —       | —    | —            | 0.02*    | 0.01 | [0,0.04]      | 0.02*   | 0.01 | [0,0.04]      | 0.02    | 0.02 | [-0.01,0.05]  |
| Living alone                           | —       | —    | —            | 0.01     | 0.01 | [-0.01,0.04]  | 0.01    | 0.01 | [-0.01,0.04]  | 0.01    | 0.01 | [-0.01,0.04]  |
| Urban residence                        | —       | —    | —            | -0.02**  | 0.01 | [-0.04,-0.01] | -0.03** | 0.01 | [-0.04,-0.01] | -0.03** | 0.01 | [-0.04,-0.01] |
| Years of education                     | —       | —    | —            | 0.00     | 0.00 | [0,0]         | 0.00    | 0.00 | [0,0]         | 0.00    | 0.00 | [0,0]         |
| Professional/administration occupation | —       | —    | —            | 0.02     | 0.02 | [-0.02,0.07]  | 0.02    | 0.02 | [-0.03,0.07]  | 0.02    | 0.02 | [-0.03,0.07]  |
| ADL-related disability                 | —       | —    | —            | -0.01*** | 0.00 | [-0.01,0]     | -0.01** | 0.00 | [-0.01,0]     | -0.01** | 0.00 | [-0.01,0]     |
| Subjective health                      | —       | —    | —            | 0.02***  | 0.00 | [0.01,0.02]   | 0.02**  | 0.00 | [0.01,0.02]   | 0.02**  | 0.01 | [0.01,0.02]   |
| C2                                     | 0.03**  | 0.01 | [0.01,0.05]  | —        | —    | —             | 0.01    | 0.01 | [0,0.02]      | 0.02    | 0.01 | [-0.01,0.04]  |
| C3                                     | 0.05*   | 0.02 | [0.01,0.09]  | —        | —    | —             | 0.03    | 0.02 | [-0.01,0.07]  | 0.04    | 0.03 | [-0.02,0.09]  |
| C4                                     | 0.02†   | 0.01 | [0,0.04]     | —        | —    | —             | 0.00    | 0.01 | [-0.02,0.03]  | 0.00    | 0.02 | [-0.03,0.03]  |
| C5                                     | 0.01    | 0.01 | [-0.01,0.03] | —        | —    | —             | 0.01    | 0.01 | [-0.02,0.03]  | 0.00    | 0.01 | [-0.03,0.03]  |
| C2×Male                                | —       | —    | —            | —        | —    | —             | —       | —    | —             | -0.01   | 0.03 | [-0.06,0.04]  |
| C3×Male                                | —       | —    | —            | —        | —    | —             | —       | —    | —             | -0.01   | 0.04 | [-0.09,0.07]  |
| C4×Male                                | —       | —    | —            | —        | —    | —             | —       | —    | —             | 0.00    | 0.03 | [-0.05,0.05]  |
| C5×Male                                | —       | —    | —            | —        | —    | —             | —       | —    | —             | 0.01    | 0.03 | [-0.03,0.06]  |

Note. † $p < .10$ , \* $p < .05$ , \*\* $p < .01$ , \*\*\* $p < .001$ .

**Supplementary Table S14.** Regression models of calculation ability among the oldest-old group.

| Variable                               | M0      |      |              | M1       |      |               | M2      |      |               | M3      |      |               |
|----------------------------------------|---------|------|--------------|----------|------|---------------|---------|------|---------------|---------|------|---------------|
|                                        | $\beta$ | SE   | 95% CI       | $\beta$  | SE   | 95% CI        | $\beta$ | SE   | 95% CI        | $\beta$ | SE   | 95% CI        |
| Age                                    | —       | —    | —            | 0.00     | 0.00 | [-0.01,0.01]  | 0.00    | 0.00 | [-0.01,0.01]  | 0.00    | 0.00 | [-0.01,0.01]  |
| Male                                   | —       | —    | —            | 0.10***  | 0.03 | [0.05,0.15]   | 0.10*** | 0.03 | [0.05,0.15]   | 0.08†   | 0.04 | [0,0.15]      |
| Living alone                           | —       | —    | —            | 0.04     | 0.03 | [-0.02,0.10]  | 0.03    | 0.03 | [-0.03,0.10]  | 0.04    | 0.03 | [-0.03,0.10]  |
| Urban residence                        | —       | —    | —            | 0.00     | 0.02 | [-0.05,0.04]  | 0.00    | 0.02 | [-0.05,0.05]  | 0.00    | 0.02 | [-0.05,0.05]  |
| Years of education                     | —       | —    | —            | 0.00     | 0.01 | [-0.01,0.01]  | 0.00    | 0.01 | [-0.01,0.01]  | 0.00    | 0.01 | [-0.01,0.01]  |
| Professional/administration occupation | —       | —    | —            | 0.10†    | 0.06 | [-0.01,0.22]  | 0.10†   | 0.06 | [-0.01,0.22]  | 0.10†   | 0.06 | [-0.01,0.22]  |
| ADL-related disability                 | —       | —    | —            | -0.02*** | 0.01 | [-0.03,-0.01] | -0.02** | 0.01 | [-0.03,-0.01] | -0.02** | 0.01 | [-0.03,-0.01] |
| Subjective health                      | —       | —    | —            | 0.02     | 0.01 | [-0.01,0.04]  | 0.01    | 0.01 | [-0.01,0.04]  | 0.01    | 0.01 | [-0.01,0.04]  |
| C2                                     | 0.07**  | 0.02 | [0.03,0.12]  | —        | —    | —             | 0.05*   | 0.03 | [0,0.10]      | 0.04    | 0.03 | [-0.02,0.10]  |
| C3                                     | 0.09†   | 0.05 | [0,0.19]     | —        | —    | —             | 0.02    | 0.05 | [-0.08,0.12]  | -0.02   | 0.07 | [-0.16,0.11]  |
| C4                                     | 0.11**  | 0.03 | [0.05,0.17]  | —        | —    | —             | 0.05    | 0.03 | [-0.01,0.12]  | 0.06    | 0.04 | [-0.02,0.14]  |
| C5                                     | 0.04    | 0.03 | [-0.02,0.10] | —        | —    | —             | 0.00    | 0.03 | [-0.06,0.06]  | 0.00    | 0.04 | [-0.07,0.07]  |
| C2×Male                                | —       | —    | —            | —        | —    | —             | —       | —    | —             | 0.08    | 0.07 | [-0.05,0.21]  |
| C3×Male                                | —       | —    | —            | —        | —    | —             | —       | —    | —             | 0.10    | 0.10 | [-0.10,0.30]  |
| C4×Male                                | —       | —    | —            | —        | —    | —             | —       | —    | —             | 0.01    | 0.07 | [-0.13,0.14]  |
| C5×Male                                | —       | —    | —            | —        | —    | —             | —       | —    | —             | 0.01    | 0.07 | [-0.12,0.14]  |

Note. † $p < .10$ , \* $p < .05$ , \*\* $p < .01$ , \*\*\* $p < .001$ .

**Supplementary Table S15.** Regression models of recall ability among the oldest-old group.

| Variable                               | M0                |      |              | M1                |      |               | M2                |      |               | M3                |      |               |
|----------------------------------------|-------------------|------|--------------|-------------------|------|---------------|-------------------|------|---------------|-------------------|------|---------------|
|                                        | $\beta$           | SE   | 95% CI       | $\beta$           | SE   | 95% CI        | $\beta$           | SE   | 95% CI        | $\beta$           | SE   | 95% CI        |
| Age                                    | —                 | —    | —            | -0.02**           | 0.01 | [-0.03,-0.01] | -0.02**           | 0.01 | [-0.03,-0.01] | -0.02**           | 0.01 | [-0.03,-0.01] |
| Male                                   | —                 | —    | —            | 0.01              | 0.03 | [-0.05,0.06]  | 0.01              | 0.03 | [-0.05,0.06]  | 0.02              | 0.05 | [-0.07,0.10]  |
| Living alone                           | —                 | —    | —            | 0.03              | 0.04 | [-0.04,0.10]  | 0.03              | 0.04 | [-0.04,0.10]  | 0.03              | 0.04 | [-0.04,0.10]  |
| Urban residence                        | —                 | —    | —            | 0.01              | 0.03 | [-0.04,0.06]  | 0.01              | 0.03 | [-0.05,0.06]  | 0.00              | 0.03 | [-0.05,0.06]  |
| Years of education                     | —                 | —    | —            | -0.01             | 0.01 | [-0.02,0]     | -0.01             | 0.01 | [-0.02,0]     | -0.01             | 0.01 | [-0.02,0]     |
| Professional/administration occupation | —                 | —    | —            | 0.13 <sup>†</sup> | 0.07 | [0,0.25]      | 0.12 <sup>†</sup> | 0.07 | [-0.01,0.25]  | 0.12 <sup>†</sup> | 0.07 | [-0.01,0.25]  |
| ADL-related disability                 | —                 | —    | —            | -0.02***          | 0.01 | [-0.03,-0.01] | -0.02***          | 0.01 | [-0.03,-0.01] | -0.02***          | 0.01 | [-0.03,-0.01] |
| Subjective health                      | —                 | —    | —            | 0.03 <sup>†</sup> | 0.01 | [0,0.06]      | 0.03 <sup>†</sup> | 0.01 | [0,0.06]      | 0.03 <sup>†</sup> | 0.01 | [0,0.06]      |
| C2                                     | 0.09**            | 0.03 | [0.04,0.14]  | —                 | —    | —             | 0.05              | 0.03 | [-0.01,0.10]  | 0.05 <sup>†</sup> | 0.03 | [-0.01,0.11]  |
| C3                                     | 0.15**            | 0.05 | [0.04,0.25]  | —                 | —    | —             | 0.09              | 0.06 | [-0.02,0.20]  | 0.11              | 0.08 | [-0.04,0.26]  |
| C4                                     | 0.06 <sup>†</sup> | 0.03 | [0,0.13]     | —                 | —    | —             | 0.01              | 0.04 | [-0.06,0.08]  | 0.00              | 0.04 | [-0.09,0.08]  |
| C5                                     | 0.06 <sup>†</sup> | 0.03 | [-0.01,0.12] | —                 | —    | —             | 0.04              | 0.03 | [-0.03,0.10]  | 0.05              | 0.04 | [-0.03,0.12]  |
| C2×Male                                | —                 | —    | —            | —                 | —    | —             | —                 | —    | —             | -0.03             | 0.07 | [-0.17,0.11]  |
| C3×Male                                | —                 | —    | —            | —                 | —    | —             | —                 | —    | —             | -0.05             | 0.11 | [-0.26,0.17]  |
| C4×Male                                | —                 | —    | —            | —                 | —    | —             | —                 | —    | —             | 0.03              | 0.07 | [-0.11,0.18]  |
| C5×Male                                | —                 | —    | —            | —                 | —    | —             | —                 | —    | —             | -0.03             | 0.07 | [-0.17,0.11]  |

Note. <sup>†</sup> $p < .10$ , \* $p < .05$ , \*\* $p < .01$ , \*\*\* $p < .001$ .

**Supplementary Table S16.** Regression models of language ability among the oldest-old group.

| Variable                               | M0                |      |              | M1                  |      |              | M2                  |      |               | M3                  |      |               |
|----------------------------------------|-------------------|------|--------------|---------------------|------|--------------|---------------------|------|---------------|---------------------|------|---------------|
|                                        | $\beta$           | SE   | 95% CI       | $\beta$             | SE   | 95% CI       | $\beta$             | SE   | 95% CI        | $\beta$             | SE   | 95% CI        |
| Age                                    | —                 | —    | —            | 0.00 <sup>†</sup>   | 0.00 | [-0.01,0]    | 0.00 <sup>†</sup>   | 0.00 | [-0.01,0]     | 0.00 <sup>†</sup>   | 0.00 | [-0.01,0]     |
| Male                                   | —                 | —    | —            | 0.02                | 0.01 | [-0.01,0.04] | 0.02                | 0.01 | [-0.01,0.04]  | 0.01                | 0.02 | [-0.03,0.05]  |
| Living alone                           | —                 | —    | —            | 0.04 <sup>**</sup>  | 0.02 | [0.01,0.07]  | 0.04 <sup>**</sup>  | 0.02 | [0.01,0.07]   | 0.04 <sup>**</sup>  | 0.02 | [0.01,0.07]   |
| Urban residence                        | —                 | —    | —            | 0.01                | 0.01 | [-0.01,0.03] | 0.01                | 0.01 | [-0.01,0.03]  | 0.01                | 0.01 | [-0.01,0.03]  |
| Years of education                     | —                 | —    | —            | 0.00                | 0.00 | [0,0.01]     | 0.00                | 0.00 | [0,0.01]      | 0.00                | 0.00 | [0,0.01]      |
| Professional/administration occupation | —                 | —    | —            | 0.03                | 0.03 | [-0.02,0.09] | 0.04                | 0.03 | [-0.02,0.09]  | 0.04                | 0.03 | [-0.02,0.10]  |
| ADL-related disability                 | —                 | —    | —            | -0.01 <sup>**</sup> | 0.00 | [-0.01,0]    | -0.01 <sup>**</sup> | 0.00 | [-0.01,0]     | -0.01 <sup>**</sup> | 0.00 | [-0.01,0]     |
| Subjective health                      | —                 | —    | —            | 0.02 <sup>**</sup>  | 0.01 | [0,0.03]     | 0.02 <sup>**</sup>  | 0.01 | [0.01,0.03]   | 0.02 <sup>**</sup>  | 0.01 | [0,0.03]      |
| C2                                     | 0.02              | 0.01 | [-0.01,0.04] | —                   | —    | —            | 0.00                | 0.01 | [-0.03,0.02]  | 0.00                | 0.01 | [-0.03,0.02]  |
| C3                                     | -0.02             | 0.02 | [-0.07,0.03] | —                   | —    | —            | -0.06 <sup>†</sup>  | 0.03 | [-0.11,-0.01] | -0.10 <sup>**</sup> | 0.03 | [-0.17,-0.04] |
| C4                                     | 0.03 <sup>†</sup> | 0.01 | [0,0.05]     | —                   | —    | —            | 0.00                | 0.02 | [-0.03,0.03]  | 0.00                | 0.02 | [-0.04,0.04]  |
| C5                                     | 0.01              | 0.01 | [-0.02,0.03] | —                   | —    | —            | -0.01               | 0.01 | [-0.04,0.02]  | 0.00                | 0.02 | [-0.03,0.03]  |
| C2×Male                                | —                 | —    | —            | —                   | —    | —            | —                   | —    | —             | 0.02                | 0.03 | [-0.05,0.08]  |
| C3×Male                                | —                 | —    | —            | —                   | —    | —            | —                   | —    | —             | 0.10 <sup>†</sup>   | 0.05 | [0,0.19]      |
| C4×Male                                | —                 | —    | —            | —                   | —    | —            | —                   | —    | —             | 0.00                | 0.03 | [-0.06,0.06]  |
| C5×Male                                | —                 | —    | —            | —                   | —    | —            | —                   | —    | —             | -0.02               | 0.03 | [-0.08,0.04]  |

Note. <sup>†</sup> $p < .10$ , <sup>\*</sup> $p < .05$ , <sup>\*\*</sup> $p < .01$ , <sup>\*\*\*</sup> $p < .001$ .



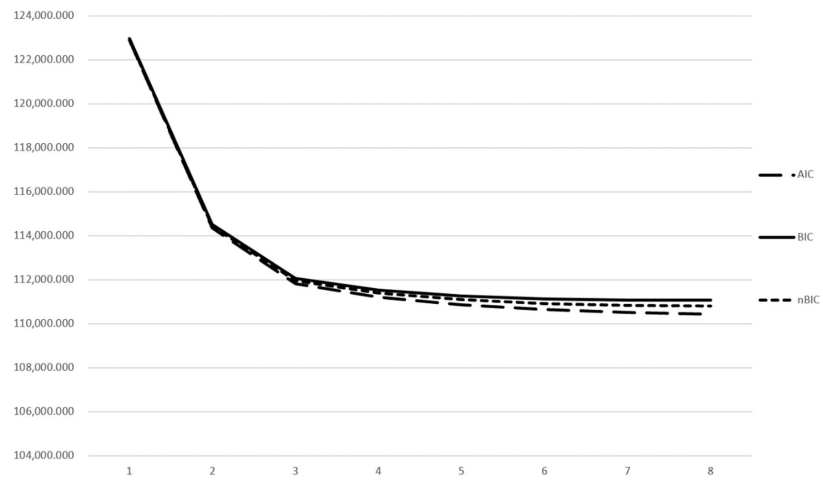

**Supplementary Figure S1.** Information criteria for 1–8 class model.
